# Supplementary material for: Hg[CS(NH 2 ) 2 ] 4 (SiF 6 ): a fluorosilicate crystal with large birefringence achieved via multi-functional group modification
Source: Royal Society of Chemistry journal article supplement (doi:10.1039/d5dt02412a), 2025-01-01
Supplement: d5dt02412a1.pdf [file d5dt02412a1.pdf]

# Hg[CS(NH<sub>2</sub>)<sub>2</sub>]<sub>4</sub>(SiF<sub>6</sub>): A Fluorosilicate Crystal with Large Birefringence Achieved via Multi-Functional Group Modification

Peng-Fei Li<sup>\*,a,c</sup>, Xin-Lei Liu<sup>a</sup>, Si-Qi Zhou<sup>b,c</sup>, Ming-Chang Wang<sup>b</sup>, Jing-Jing Wu<sup>a</sup>, Yu-Wu Zhong<sup>\*,a</sup>, Jiannian Yao<sup>a</sup>

<sup>a</sup> Institute of Molecular Engineering Plus, College of Chemistry, Fuzhou University, Fuzhou, 350108, P. R. China.

<sup>b</sup> Fujian Normal University, Fuzhou, 350007, P. R. China.

<sup>c</sup> State Key Laboratory of Functional Crystals and Devices, Fujian Institute of Research on the Structure of Matter, Chinese Academy of Sciences, Fuzhou 350002, P. R. China.

\*Corresponding Authors: Peng-Fei Li: lipengfei@fzu.edu.cn; lipengfei81@163.com

\*Corresponding Authors: Yu-Wu Zhong: zhongyuwu@fzu.edu.cn

## Supporting Information

|                                                                                                                                                                                                                                                                                                                           |     |
|---------------------------------------------------------------------------------------------------------------------------------------------------------------------------------------------------------------------------------------------------------------------------------------------------------------------------|-----|
| <b>S1. Experimental Section</b> .....                                                                                                                                                                                                                                                                                     | S2  |
| <b>S2. Computational Method</b> .....                                                                                                                                                                                                                                                                                     | S3  |
| <b>Table S1.</b> Summary of crystal data and structural refinements for Hg[CS(NH <sub>2</sub> ) <sub>2</sub> ] <sub>4</sub> (SiF <sub>6</sub> ). ....                                                                                                                                                                     | S5  |
| <b>Table S2.</b> Selected bond distances (Å) for Hg[CS(NH <sub>2</sub> ) <sub>2</sub> ] <sub>4</sub> (SiF <sub>6</sub> ).....                                                                                                                                                                                             | S6  |
| <b>Table S3.</b> Atomic coordinates (×10 <sup>4</sup> ) and equivalent isotropic displacement parameters (Å <sup>2</sup> ×10 <sup>3</sup> ) for Hg[CS(NH <sub>2</sub> ) <sub>2</sub> ] <sub>4</sub> (SiF <sub>6</sub> ). U <sub>eq</sub> is defined as 1/3 of the trace of the orthogonalised U <sub>ij</sub> tensor..... | S7  |
| <b>Table S4.</b> Selected bond angles for Hg[CS(NH <sub>2</sub> ) <sub>2</sub> ] <sub>4</sub> (SiF <sub>6</sub> ).....                                                                                                                                                                                                    | S8  |
| <b>Table S5.</b> State energies (eV) of the lowest conduction band (L-CB) and the highest valence band (H-VB) of Hg[CS(NH <sub>2</sub> ) <sub>2</sub> ] <sub>4</sub> (SiF <sub>6</sub> ).....                                                                                                                             | S9  |
| <b>Figure S1.</b> Simulated and experimental powder X-ray diffractometer patterns of Hg[CS(NH <sub>2</sub> ) <sub>2</sub> ] <sub>4</sub> (SiF <sub>6</sub> ). ....                                                                                                                                                        | S10 |
| <b>Figure S2.</b> The thermal stability curves of Hg[CS(NH <sub>2</sub> ) <sub>2</sub> ] <sub>4</sub> (SiF <sub>6</sub> ). ....                                                                                                                                                                                           | S11 |
| <b>Figure S3.</b> Arrangement of the CS(NH <sub>2</sub> ) <sub>2</sub> groups in Hg[CS(NH <sub>2</sub> ) <sub>2</sub> ] <sub>4</sub> (SiF <sub>6</sub> ). ....                                                                                                                                                            | S12 |
| <b>References</b> .....                                                                                                                                                                                                                                                                                                   | S13 |

## S1. Experimental Section

### Materials and Instrumentations.

All the chemicals were obtained from commercial sources and used without further purification:  $\text{CS}(\text{NH}_2)_2$  (Adamas-beta, 99%),  $\text{Hg}(\text{CF}_3\text{SO}_3)_2$  (Adamas-beta, 98%), and  $\text{H}_2\text{SiF}_6$  (Adamas-beta, 30% in water).

**Powder X-ray** diffraction (PXRD) patterns of  $\text{Hg}[\text{CS}(\text{NH}_2)_2]_4(\text{SiF}_6)$  was collected on the Miniflex 600 powder X-ray diffractometer using  $\text{Cu K}\alpha$  radiation ( $\lambda = 1.54186 \text{ \AA}$ ) at room temperature in the angular range of  $2\theta = 5\text{-}70^\circ$  with a scan step size of  $0.02^\circ$ .

**Microprobe elemental analysis** was carried out with the aid of a field-emission scanning electron microscope (JSM6700F) outfitted with an energy-dispersive X-ray spectroscope (Oxford INCA).

**IR spectra** were carried out on a Magna 750 FT-IR spectrometer using air as background in the range of  $4000\text{--}400 \text{ cm}^{-1}$  with a resolution of  $2 \text{ cm}^{-1}$  at room temperature.

**The UV-vis-NIR spectra** were obtained at  $2000\text{--}200 \text{ nm}$  by a PerkinElmer Lambda 900 spectrophotometer using  $\text{BaSO}_4$  as the reference, and the reflection spectra were converted into an absorption spectrum using the Kubelka-Munk function. Absorption data was calculated from the diffuse reflection data by the Kubelka-Munk function:  $\alpha/S = (1-R)^2/2R$ , where  $\alpha$  and  $S$  represent the absorption coefficient and the scattering coefficient, respectively. The band gap value can be given by extrapolating the absorption edge to the baseline in the  $\alpha/S$  vs. energy graph.

**Thermogravimetric analyses** (TGA) and differential scanning calorimetry (DSC) were measured by Netzsch STA 499C installation. The samples about  $3.0\text{--}5.0 \text{ mg}$  were placed in alumina crucibles and heated in  $20\text{--}700 \text{ }^\circ\text{C}$  at a rate of  $15 \text{ }^\circ\text{C}/\text{min}$  under  $\text{N}_2$  atmosphere.

**Single-crystal X-ray diffraction** data was obtained on Agilent Technologies SuperNova dual-wavelength CCD diffractometer with a graphite-monochromated  $\text{Mo K}\alpha$  radiation ( $\lambda = 0.71073 \text{ \AA}$ ) at room temperature. Data reduction and cell refinement and were performed with *CrysAlisPro*. The structure was solved by the direct methods and refined by full-matrix least-

squares fitting on  $F^2$  using *OLEX2-1.5* crystallographic software package. All non-hydrogen atoms were refined with anisotropic thermal parameters. The structural data were also checked by PLATON and no higher symmetry was found. The detailed crystallographic data for  $\text{Hg}[\text{CS}(\text{NH}_2)_2]_4(\text{SiF}_6)$  was given in Table S1. The bond lengths and bond angles were listed in Table S2 and S4.

## S2. Computational Method

Single-crystal structural data of  $\text{Hg}[\text{CS}(\text{NH}_2)_2]_4(\text{SiF}_6)$  was used for the theoretical calculations. The electronic structures were performed using a plane-wave basis set and pseudo-potentials within density functional theory (DFT) implemented in the total-energy code CASTEP<sup>1</sup>. For the exchange and correlation functional, we chose Perdew-Burke-Ernzerhof (PBE) in the generalized gradient approximation (GGA)<sup>2</sup>. The interactions between the ionic cores and the electrons were described by the Non-conserving pseudopotential in reciprocal space<sup>3</sup>. The following valence-electron configurations were considered in the computation: Hg-5d<sup>10</sup>5p<sup>2</sup>6s<sup>2</sup>, C-2s<sup>2</sup>2p<sup>2</sup>, S-3s<sup>2</sup>3p<sup>4</sup>, N-2s<sup>2</sup>2p<sup>3</sup>, H-1s<sup>2</sup>, Si-3s<sup>2</sup>3p<sup>2</sup> and F-2s<sup>2</sup>2p<sup>5</sup>. The numbers of plane waves included in the basics sets were determined by cutoff energy of 850 eV for  $\text{Hg}[\text{CS}(\text{NH}_2)_2]_4(\text{SiF}_6)$ . The Brillouin zone integration was performed using a 2×2×2 Monkhorst-Pack k-point mesh, whose convergence was verified against denser k-point samplings. All other calculation parameters and convergence criteria were set to the CASTEP code defaults.

The calculations of linear optical properties in terms of the complex dielectric function  $\varepsilon(\omega) = \varepsilon_1(\omega) + i\varepsilon_2(\omega)$  were made. The imaginary part of the dielectric function  $\varepsilon_2$  was given in the following equation:

$$\varepsilon_{ij_2}(\omega) = \frac{8\pi^2\hbar^2e^2}{(m^2V)} \sum_k \sum_{cv} (f_c - f_v) \frac{p_{cv}^i(k)p_{cv}^j(k)}{E_{vc}^2} \delta[E_c(k) - E_v(k) - \hbar\omega]$$

The  $f_c$  and  $f_v$  represent the Fermi distribution functions of the conduction and valence band. The term  $p_{cv}^i(k)$  denotes the momentum matrix element transition from the energy level  $c$  of the conduction band to the level  $v$  of the valence band at the  $k$ th point in the Brillouin zone (BZ), and  $V$  is the volume of the unit cell.

The real part  $\varepsilon_1(\omega)$  of the dielectric function  $\varepsilon(\omega)$  follows from the Kramer-Kronig relationship. All the other optical constants may be derived from  $\varepsilon_1(\omega)$  and  $\varepsilon_2(\omega)$ . For example, the refractive index  $n(\omega)$  can be calculated using the following expression<sup>4</sup>:

$$n(\omega) = \frac{1}{\sqrt{2}} [\sqrt{\varepsilon_1^2(\omega) + \varepsilon_2^2(\omega)} + \varepsilon_1(\omega)]^{1/2}$$

Furthermore, a sensitivity analysis of the scissor operator was conducted. The calculated birefringence values were 0.120 @1064 nm and 0.139 @546 nm with a 0.3 eV scissor operator, and 0.130 @1064 nm and 0.115 @546 nm with a 0.6 eV operator.

**Table S1.** Summary of crystal data and structural refinements for Hg[CS(NH<sub>2</sub>)<sub>2</sub>]<sub>4</sub>(SiF<sub>6</sub>).

| <b>Molecular formula</b>                                                                                                                                                                                                                                           | <b>Hg[CS(NH<sub>2</sub>)<sub>2</sub>]<sub>4</sub>(SiF<sub>6</sub>)</b> |
|--------------------------------------------------------------------------------------------------------------------------------------------------------------------------------------------------------------------------------------------------------------------|------------------------------------------------------------------------|
| Formula Weight                                                                                                                                                                                                                                                     | 647.17                                                                 |
| Crystal system                                                                                                                                                                                                                                                     | monoclinic                                                             |
| Space group                                                                                                                                                                                                                                                        | <i>P</i> 2 <sub>1</sub> / <i>c</i>                                     |
| Temperature (K)                                                                                                                                                                                                                                                    | 296.15                                                                 |
| F(000)                                                                                                                                                                                                                                                             | 1232.0                                                                 |
| a/Å                                                                                                                                                                                                                                                                | 11.9952(8)                                                             |
| b/Å                                                                                                                                                                                                                                                                | 13.2312(8)                                                             |
| c/Å                                                                                                                                                                                                                                                                | 11.8979(10)                                                            |
| α/deg                                                                                                                                                                                                                                                              | 90                                                                     |
| β/deg                                                                                                                                                                                                                                                              | 104.765(7)                                                             |
| γ/deg                                                                                                                                                                                                                                                              | 90                                                                     |
| V/Å <sup>3</sup>                                                                                                                                                                                                                                                   | 1826.0(2)                                                              |
| Z                                                                                                                                                                                                                                                                  | 4                                                                      |
| D <sub>calc</sub> /g·cm <sup>-3</sup>                                                                                                                                                                                                                              | 2.354                                                                  |
| GOF on F <sup>2</sup>                                                                                                                                                                                                                                              | 1.028                                                                  |
| R <sub>1</sub> , wR <sub>2</sub> [I > 2σ(I)] <sup>a</sup>                                                                                                                                                                                                          | R <sub>1</sub> = 0.0344, wR <sub>2</sub> = 0.0753                      |
| R <sub>1</sub> , wR <sub>2</sub> (all data) <sup>a</sup>                                                                                                                                                                                                           | R <sub>1</sub> = 0.0433, wR <sub>2</sub> = 0.0812                      |
| <sup>a</sup> R <sub>1</sub> = Σ  F <sub>o</sub>   -  F <sub>c</sub>   /Σ F <sub>o</sub>  , wR <sub>2</sub> = {Σw[(F <sub>o</sub> ) <sup>2</sup> - (F <sub>c</sub> ) <sup>2</sup> ] <sup>2</sup> /Σw[(F <sub>o</sub> ) <sup>2</sup> ] <sup>2</sup> } <sup>1/2</sup> |                                                                        |

**Table S2.** Selected bond distances (Å) for Hg[CS(NH<sub>2</sub>)<sub>2</sub>]<sub>4</sub>(SiF<sub>6</sub>).

| <b>Bond</b> | <b>Bond lengths</b> |
|-------------|---------------------|
| Hg(1)-S(1)  | 2.545(2)            |
| Hg(1)-S(2)  | 2.594(18)           |
| Hg(1)-S(3)  | 2.555(18)           |
| Hg(1)-S(4)  | 2.493(17)           |
| Si(1)-F(1)  | 1.691(4)            |
| Si(1)-F(2)  | 1.659(5)            |
| Si(1)-F(3)  | 1.665(5)            |
| Si(1)-F(4)  | 1.686(4)            |
| Si(1)-F(5)  | 1.669(5)            |
| Si(1)-F(6)  | 1.682(5)            |
| C(1)-N(1)   | 1.308(9)            |
| C(1)-N(2)   | 1.307(9)            |
| C(1)-S(1)   | 1.733(7)            |
| C(2)-N(3)   | 1.303(9)            |
| C(2)-N(4)   | 1.309(9)            |
| C(2)-S(2)   | 1.735(7)            |
| C(3)-N(5)   | 1.310(8)            |
| C(3)-N(6)   | 1.304(9)            |
| C(3)-S(3)   | 1.750(7)            |
| C(4)-N(7)   | 1.321(9)            |
| C(4)-N(8)   | 1.308(9)            |
| C(4)-S(4)   | 1.720(7)            |

**Table S3.** Atomic coordinates ( $\times 10^4$ ) and equivalent isotropic displacement parameters ( $\text{\AA}^2 \times 10^3$ ) for  $\text{Hg}[\text{CS}(\text{NH}_2)_2]_4(\text{SiF}_6)$ .  $U_{\text{eq}}$  is defined as 1/3 of the trace of the orthogonalised  $U_{ij}$

| tensor. |            |            |             |               |
|---------|------------|------------|-------------|---------------|
| Atom    | <i>x</i>   | <i>y</i>   | <i>z</i>    | <i>U</i> (eq) |
| Hg1     | 5272.2(2)  | 4786.6(2)  | 12420.9(2)  | 33.91(12)     |
| S4      | 3238.6(14) | 4207.3(12) | 11685.3(16) | 31.0(4)       |
| S3      | 5577.3(16) | 6682.3(13) | 12777.9(16) | 34.0(4)       |
| S2      | 6072.3(16) | 3849.7(13) | 14375.0(15) | 33.8(4)       |
| S1      | 6200.4(17) | 4162.5(15) | 10849.7(17) | 39.2(4)       |
| Si1     | 345.8(15)  | 2282.1(14) | 9460.1(17)  | 28.3(4)       |
| F1      | -1108(3)   | 2201(3)    | 9043(4)     | 40.4(10)      |
| F4      | 1798(3)    | 2343(3)    | 9859(4)     | 45.3(11)      |
| F2      | 310(4)     | 3220(4)    | 8525(5)     | 72.3(17)      |
| F3      | 246(4)     | 3106(4)    | 10487(5)    | 67.0(15)      |
| F5      | 403(4)     | 1337(4)    | 10402(5)    | 64.2(15)      |
| N5      | 7687(5)    | 6839(4)    | 12496(5)    | 36.8(14)      |
| N4      | 6806(6)    | 5570(5)    | 15485(5)    | 39.8(15)      |
| F6      | 459(4)     | 1426(4)    | 8449(5)     | 68.3(16)      |
| N6      | 6238(5)    | 6974(5)    | 10840(5)    | 38.3(15)      |
| N7      | 2680(5)    | 6170(5)    | 11772(6)    | 45.3(17)      |
| C3      | 6588(6)    | 6843(5)    | 11960(6)    | 26.5(14)      |
| C2      | 7095(6)    | 4739(5)    | 15031(6)    | 29.3(15)      |
| N3      | 8182(6)    | 4576(5)    | 15102(7)    | 54(2)         |
| N2      | 8327(5)    | 4446(5)    | 12185(6)    | 48.5(17)      |
| N1      | 8001(6)    | 2970(5)    | 11199(6)    | 52.9(19)      |
| N8      | 1217(5)    | 5045(5)    | 11291(7)    | 57(2)         |
| C4      | 2326(6)    | 5226(5)    | 11576(6)    | 31.1(15)      |
| C1      | 7620(6)    | 3835(5)    | 11483(6)    | 32.9(16)      |

**Table S4.** Selected bond angles for Hg[CS(NH<sub>2</sub>)<sub>2</sub>]<sub>4</sub>(SiF<sub>6</sub>).

| Atom | Atom | Atom | Angle/°   | Atom | Atom | Atom | Angle/°  |
|------|------|------|-----------|------|------|------|----------|
| S4   | Hg1  | S3   | 116.49(6) | F3   | Si1  | F6   | 178.5(3) |
| S4   | Hg1  | S2   | 105.85(6) | F5   | Si1  | F1   | 90.7(2)  |
| S4   | Hg1  | S1   | 102.38(6) | F5   | Si1  | F4   | 89.1(2)  |
| S3   | Hg1  | S2   | 108.40(6) | F5   | Si1  | F6   | 88.8(3)  |
| S1   | Hg1  | S3   | 111.70(6) | F6   | Si1  | F1   | 90.7(2)  |
| S1   | Hg1  | S2   | 111.85(6) | F6   | Si1  | F4   | 88.2(2)  |
| C4   | S4   | Hg1  | 109.4(2)  | N5   | C3   | S3   | 118.9(5) |
| C3   | S3   | Hg1  | 96.7(2)   | N6   | C3   | S3   | 119.8(5) |
| C2   | S2   | Hg1  | 97.8(2)   | N6   | C3   | N5   | 121.4(6) |
| C1   | S1   | Hg1  | 109.1(2)  | N4   | C2   | S2   | 121.6(6) |
| F4   | Si1  | F1   | 178.9(3)  | N3   | C2   | S2   | 119.8(6) |
| F2   | Si1  | F1   | 90.1(2)   | N3   | C2   | N4   | 118.5(7) |
| F2   | Si1  | F4   | 90.1(3)   | N7   | C4   | S4   | 123.9(5) |
| F2   | Si1  | F3   | 90.5(3)   | N8   | C4   | S4   | 117.5(5) |
| F2   | Si1  | F5   | 179.2(3)  | N8   | C4   | N7   | 118.6(7) |
| F2   | Si1  | F6   | 91.0(3)   | N2   | C1   | S1   | 122.0(6) |
| F3   | Si1  | F1   | 89.7(2)   | N2   | C1   | N1   | 119.6(7) |
| F3   | Si1  | F4   | 91.4(2)   | N1   | C1   | S1   | 118.4(6) |
| F3   | Si1  | F5   | 89.8(3)   |      |      |      |          |



**Table S5.** State energies (eV) of the lowest conduction band (L-CB) and the highest valence band (H-VB) of Hg[CS(NH<sub>2</sub>)<sub>2</sub>]<sub>4</sub>(SiF<sub>6</sub>).

| Compound                                                                | k-point                  | L-CB     | H-VB     |
|-------------------------------------------------------------------------|--------------------------|----------|----------|
| Hg[CS(NH <sub>2</sub> ) <sub>2</sub> ] <sub>4</sub> (SiF <sub>6</sub> ) | Z (0.000, 0.000, 0.500)  | 3.036249 | -0.00655 |
|                                                                         | G (0.000, 0.000, 0.000)  | 2.979945 | -0.0194  |
|                                                                         | Y (0.000, 0.500, 0.000)  | 3.018859 | -0.04572 |
|                                                                         | A (-0.500, 0.500, 0.000) | 3.018254 | -0.05825 |
|                                                                         | B (-0.500, 0.000, 0.000) | 2.979949 | -0.03092 |
|                                                                         | D (-0.500, 0.000, 0.500) | 3.031659 | -0.01947 |
|                                                                         | E (-0.500, 0.500, 0.500) | 3.05326  | -0.01361 |
|                                                                         | C (0.000, 0.500, 0.500)  | 3.052199 | 0        |

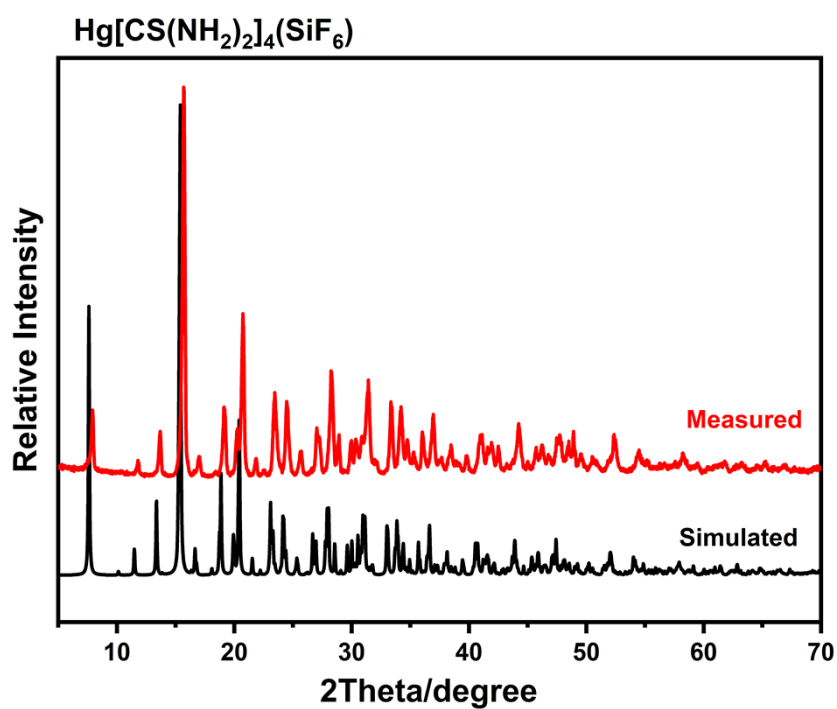

**Figure S1.** Simulated and experimental powder X-ray diffractometer patterns of  $\text{Hg}[\text{CS}(\text{NH}_2)_2]_4(\text{SiF}_6)$ .

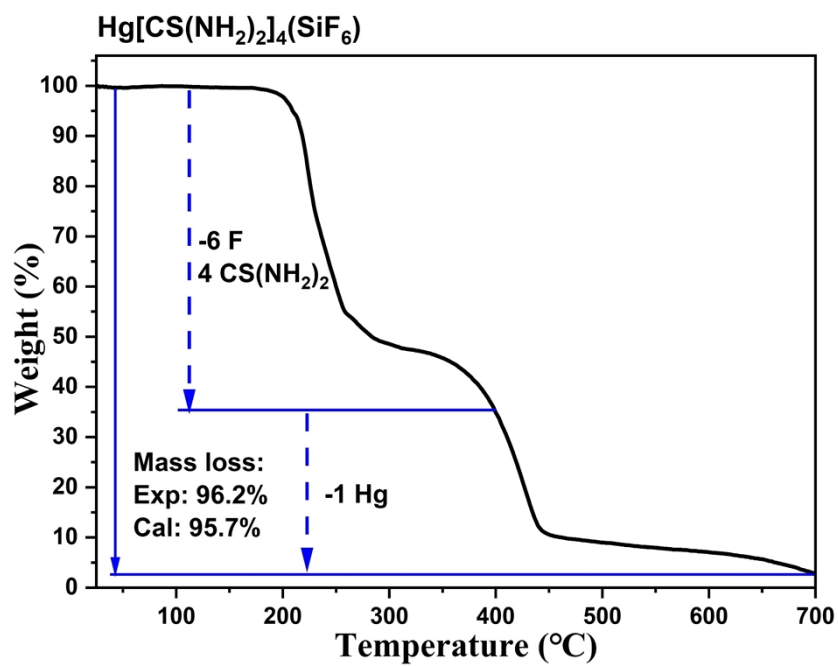

**Figure S2.** The thermal stability curves of Hg[CS(NH<sub>2</sub>)<sub>2</sub>]<sub>4</sub>(SiF<sub>6</sub>).

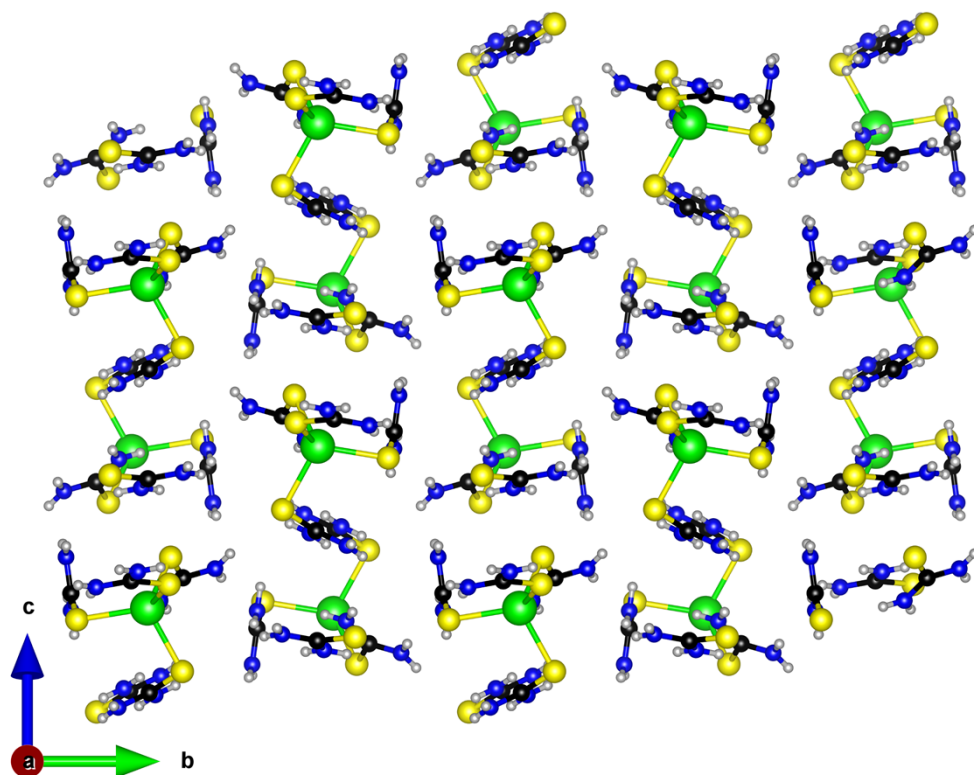

**Figure S3.** Arrangement of the  $\text{CS}(\text{NH}_2)_2$  groups in  $\text{Hg}[\text{CS}(\text{NH}_2)_2]_4(\text{SiF}_6)$ .

## References

1. Segall, M. D.; Lindan, P. J. D.; Probert, M. J.; Pickard, C. J.; Hasnip, P. J.; Clark, S. J.; Payne, M. C., First-principles simulation: ideas, illustrations and the CASTEP code. *Phys-Condens Mat.* **2002**, *14* (11), 2717-2744.
2. Milman, V.; Winkler, B.; White, J. A.; Pickard, C. J.; Payne, M. C.; Akhmatkaya, E. V.; Nobes, R. H., Electronic structure, properties, and phase stability of inorganic crystals: A pseudopotential plane-wave study. *Int. J. Quantum. Chem.* **2000**, *77*, 895-910.
3. Perdew, J. P.; Burke, K.; Ernzerhof, M., Generalized Gradient Approximation Made Simple. *Phys. Rev. Lett.* **1996**, *77* (18), 3865-3868.
4. Vanderbilt, D., Soft self-consistent pseudopotentials in a generalized eigenvalue formalism. *Phys Rev B Condens Matter.* **1990**, *41* (11), 7892-7895.
